# Supplementary material for: Novel Bioactive Paulomycin Derivatives Produced by Streptomyces albus J1074
Source: Molecules. 2017 Oct 18;22(10):1758. doi: 10.3390/molecules22101758 (PMC6151807; doi:10.3390/molecules22101758)

## Supplementary material

### Structural characterization of compounds in peak 1

**Figure S1.** Chromatogram (trace at 210 nm) of peak 1.

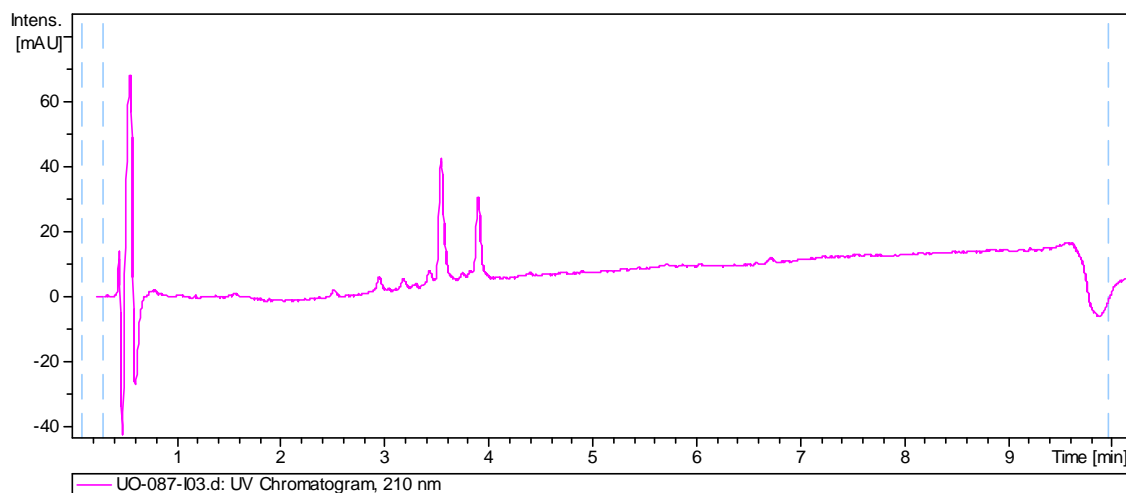

**Figure S2.** HRMS spectra of compound **1** (3.55 min) and secondary compound **1'** (3.90 min) in peak 1.

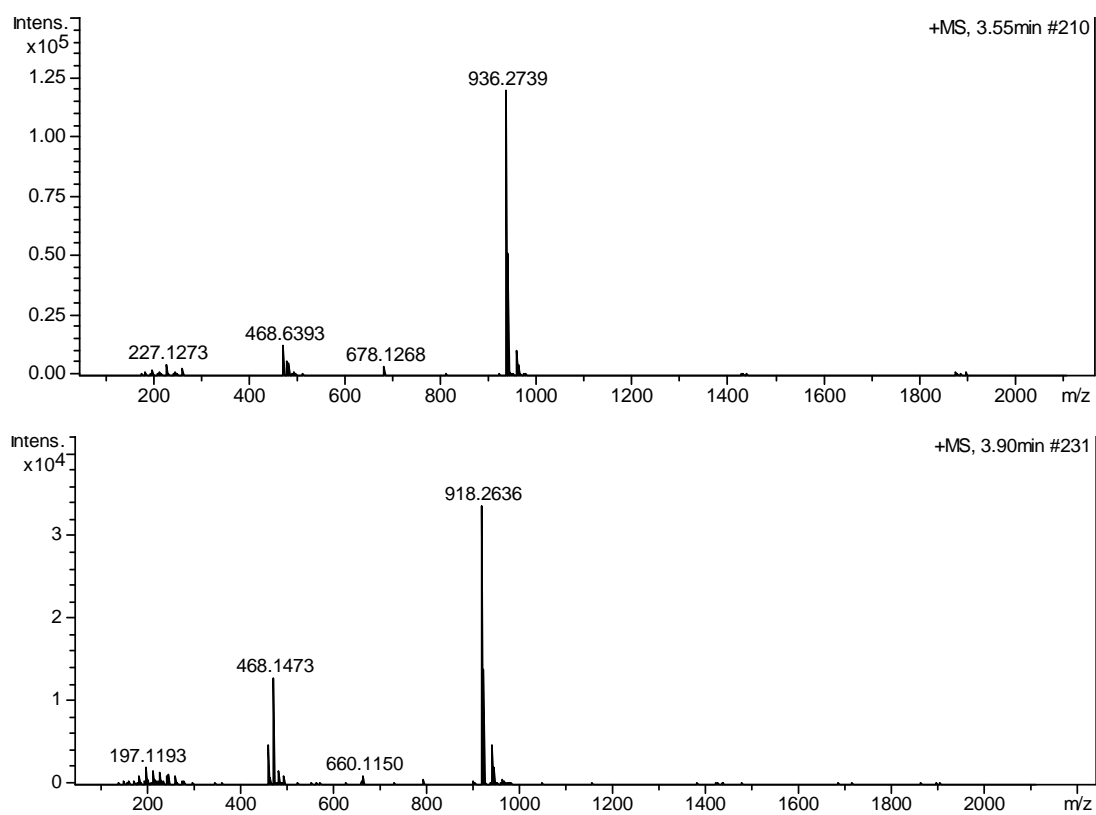

**Figure S3.** UV-vis (DAD) spectra of compound **1** (3.55 min) and secondary compound **1'** (3.90 min) in peak **1**.

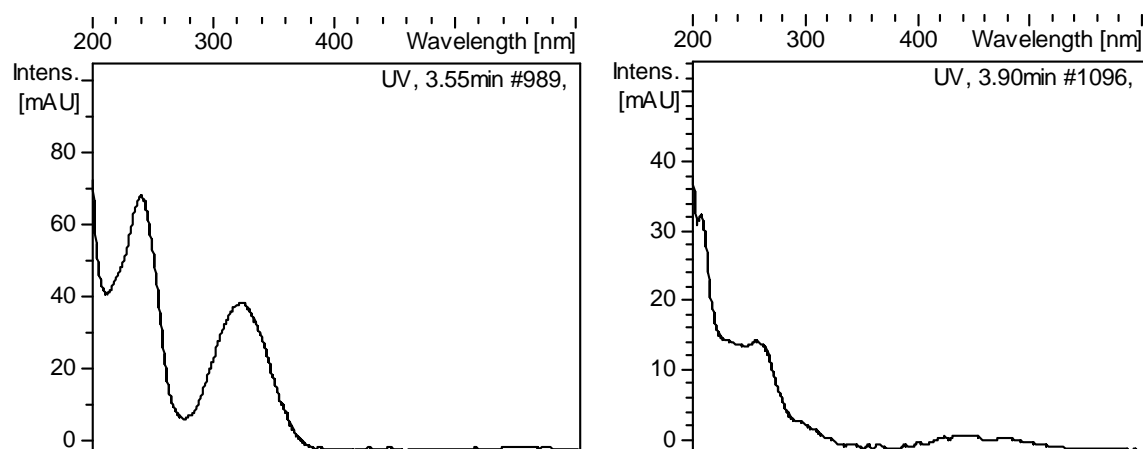

**Figure S4.**  $^1\text{H}$  NMR spectrum of peak **1** ( $\text{DMSO-}d_6$ , 500 MHz).

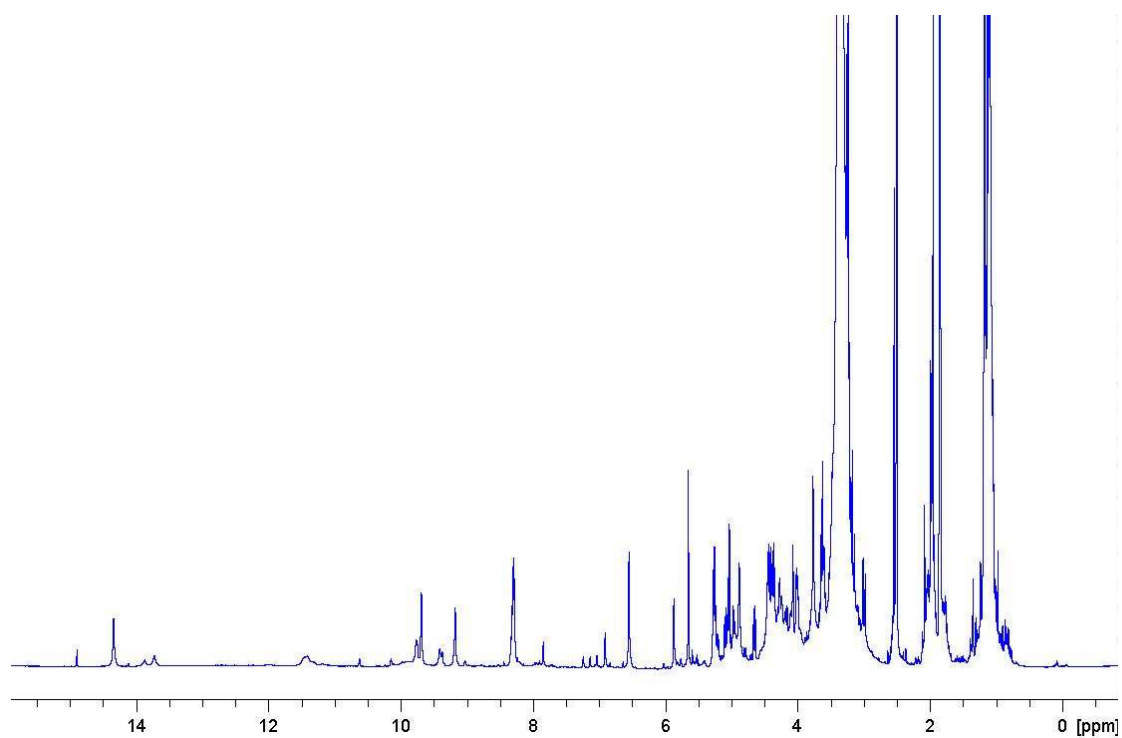

**Figure S5.** HSQC spectrum of peak 1.

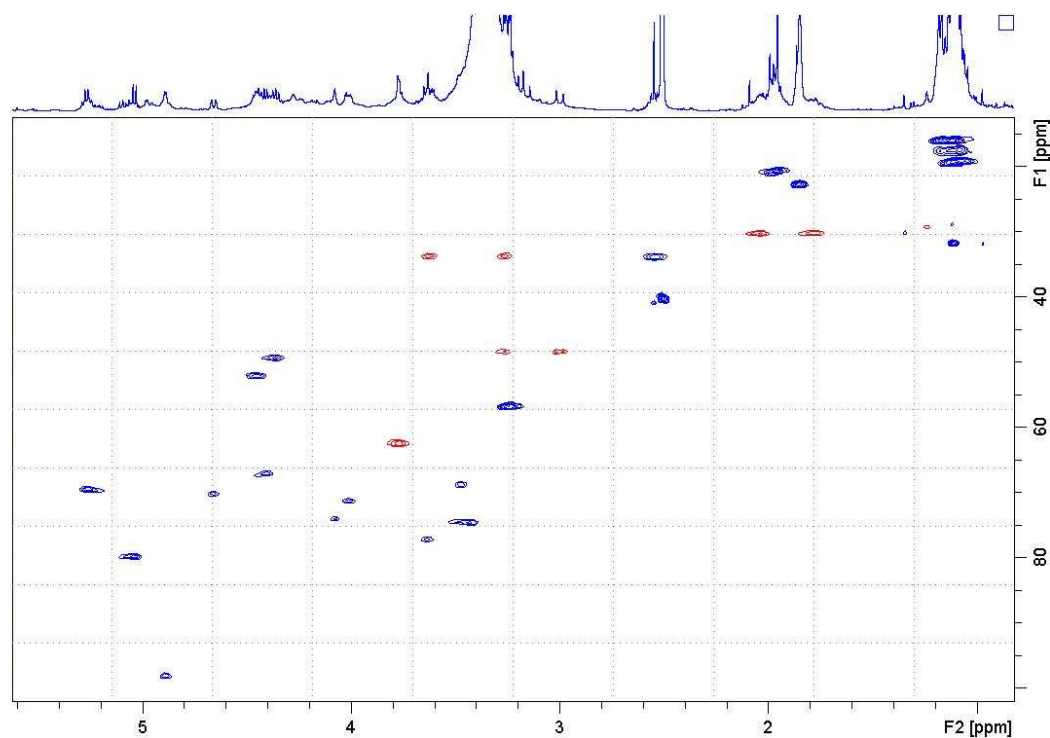

**Figure S6.** Key HMBC correlations for main compound **1** in peak **1**, which connect the *N*-acetylcysteine moiety to the thiazoline heterocycle

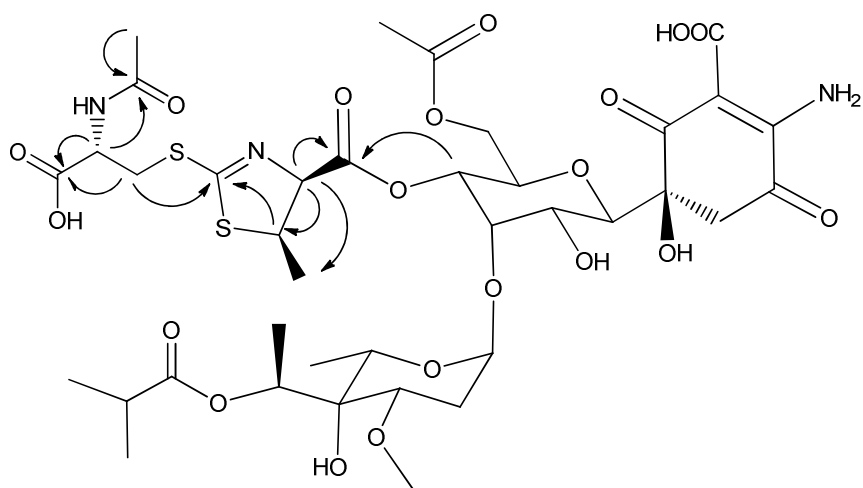

**Figure S7.** Key NOESY correlation for main compound **1** in peak **1**, which determines the relative configuration of the thiazoline heterocycle.

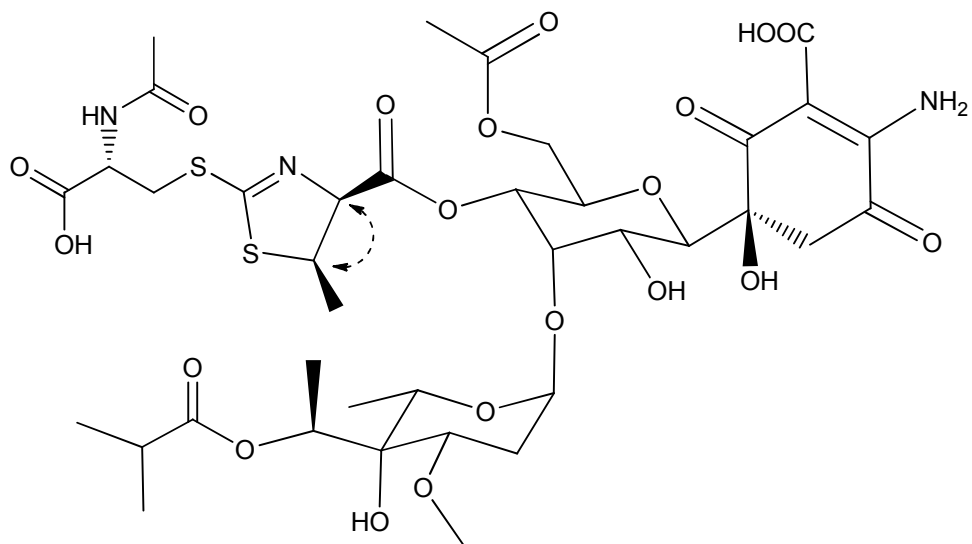

**Figure S8.** Proposed mechanism explaining the formation of compound **1** from antibiotic 273a<sub>2β</sub>.

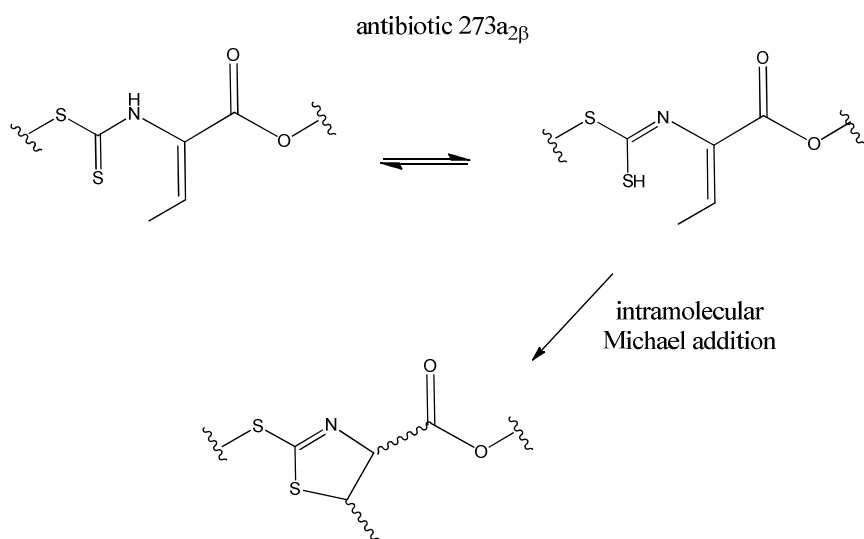

## Structural characterization of compounds in peak 2

**Figure S9.** Chromatogram (trace at 210 nm) of peak 2.

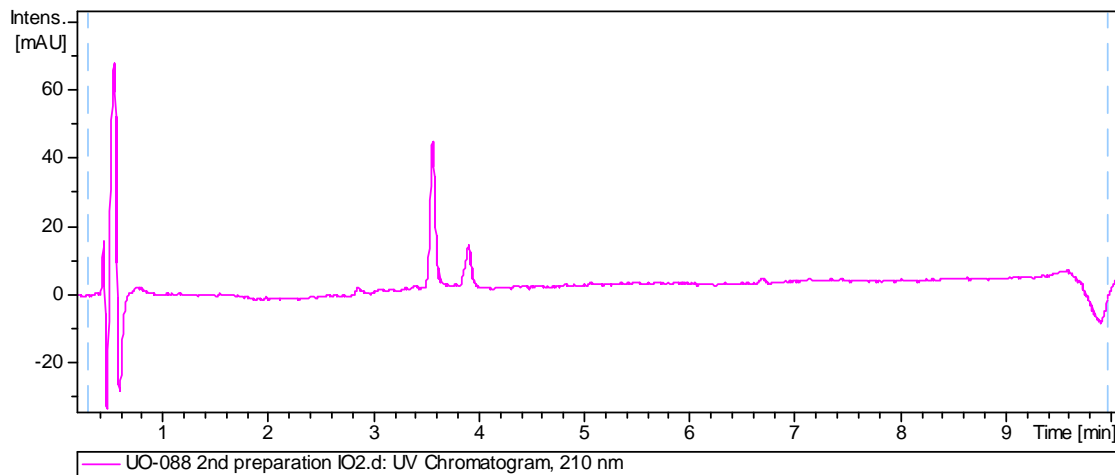

**Figure S10.** HRMS spectra of compound **2** (3.57 min) and secondary compound **2'** (3.90 min) in peak 2.

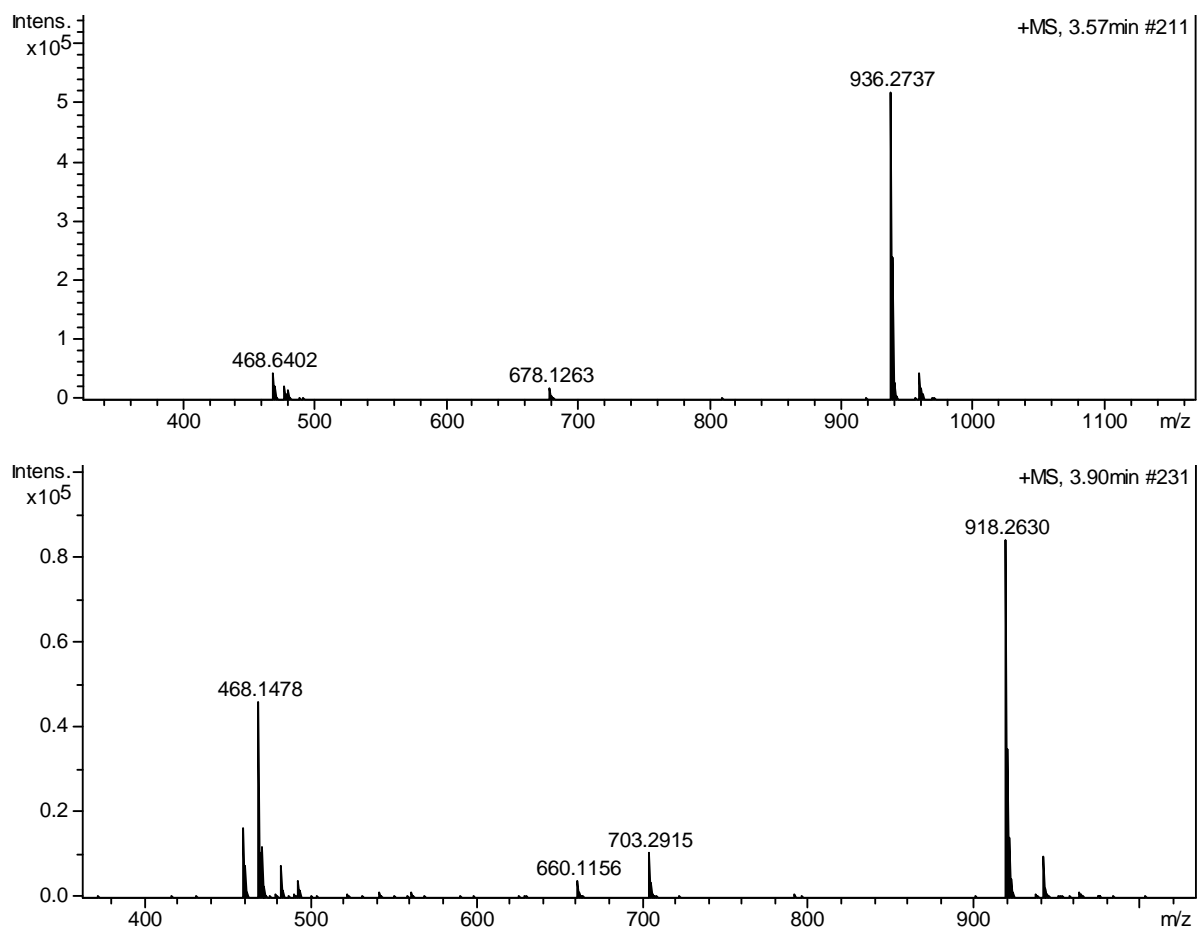

**Figure S11.** UV-vis (DAD) spectra of compound **2** (3.57 min) and secondary compound **2'** (3.91 min) in peak **2**.

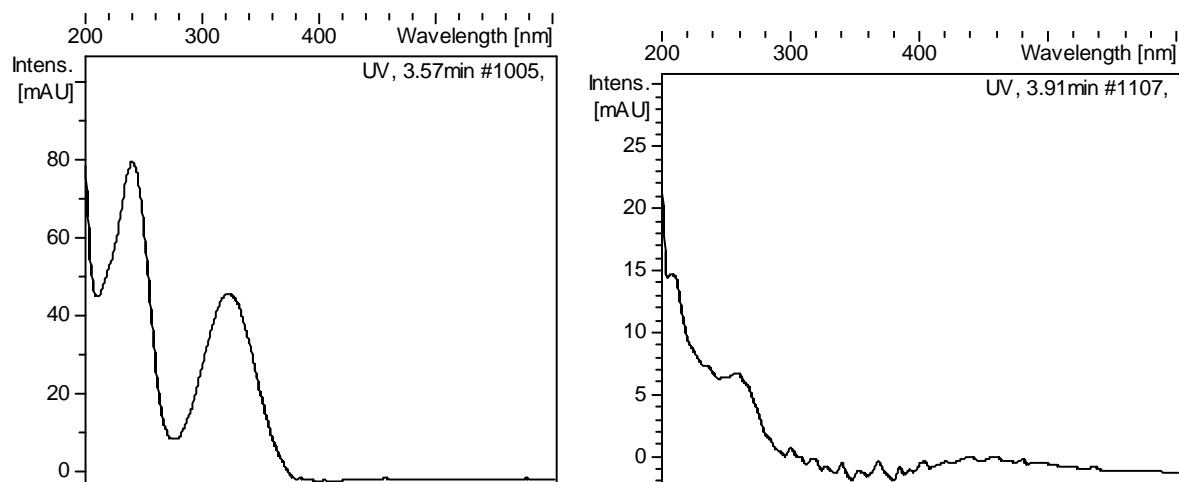

**Figure S12.**  $^1\text{H}$  NMR spectrum of peak **2** (DMSO- $d_6$ , 500 MHz).

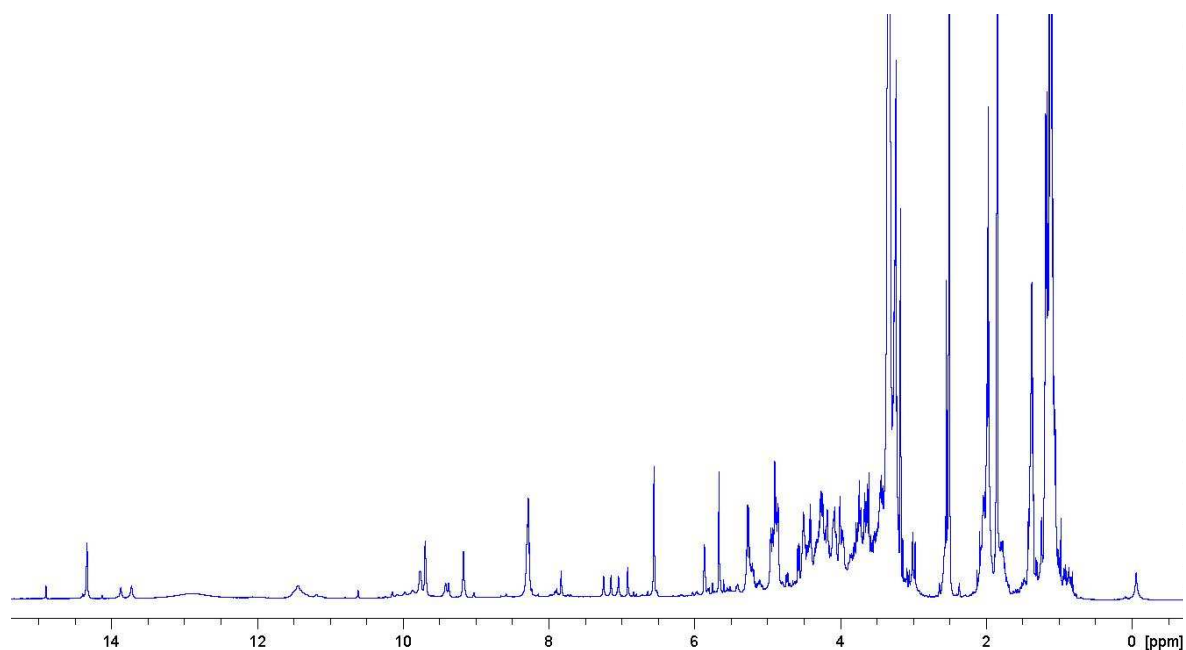

**Figure S13.** HSQC spectrum of peak 2.

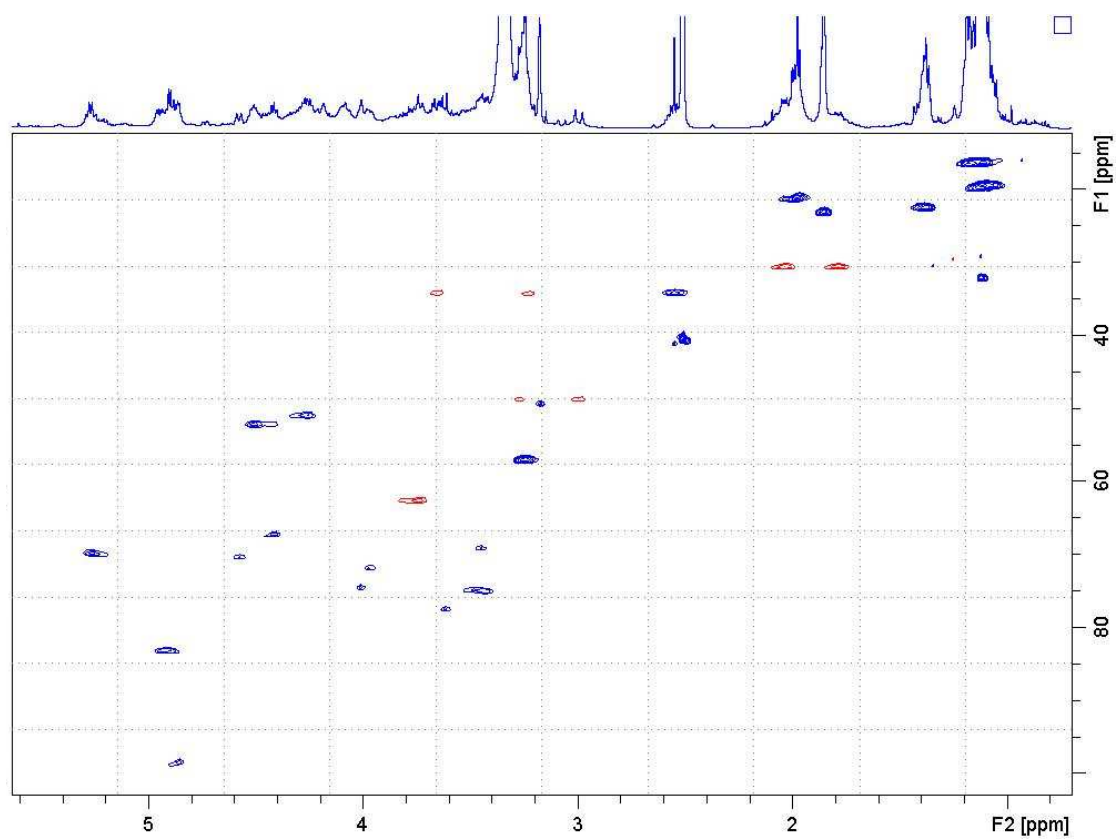

### Structural characterization of compounds in peak 3

**Figure S14.** Chromatogram (trace at 210 nm) of peak 3.

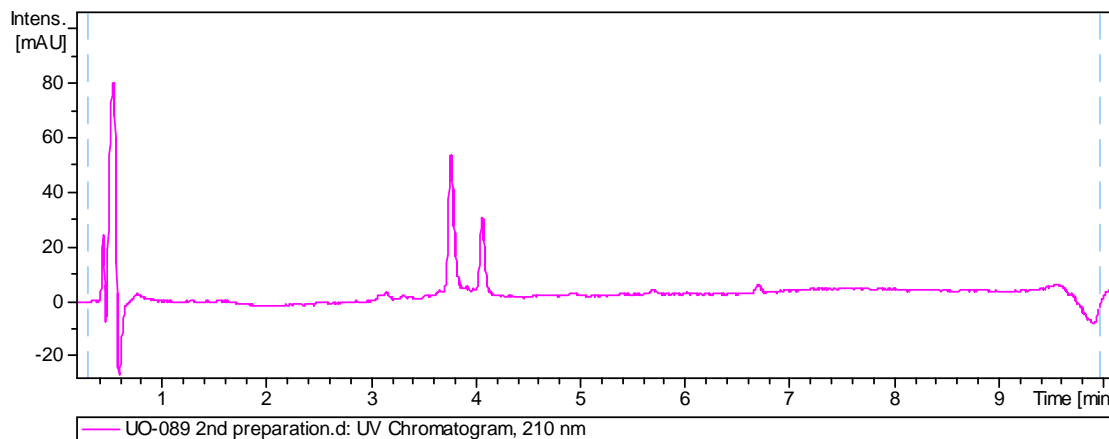

**Figure S15.** HRMS spectra of compound **3** (3.77 min) and secondary compound **3'** (4.07 min) in peak 3.

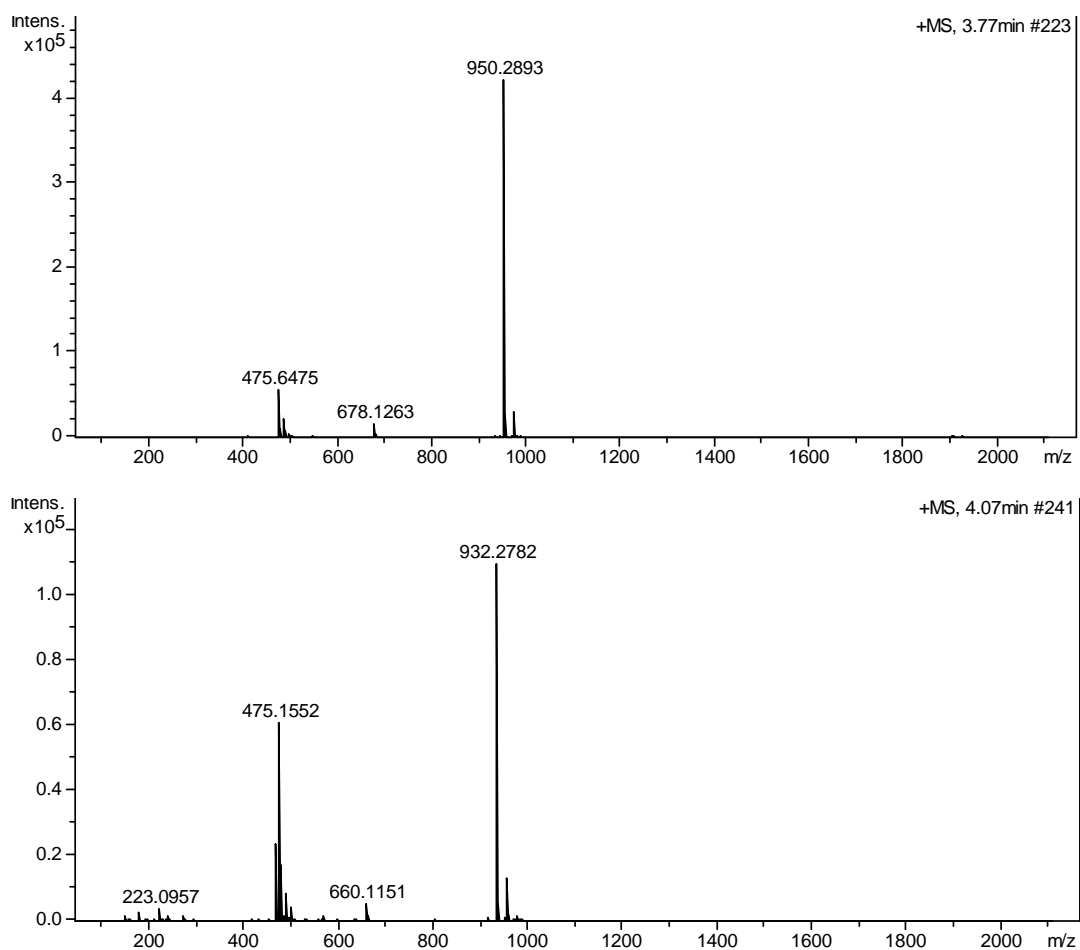

**Figure S16.** UV-vis (DAD) spectra of compound **3** (3.77 min) and secondary compound **3'** (4.06 min) in peak **3**.

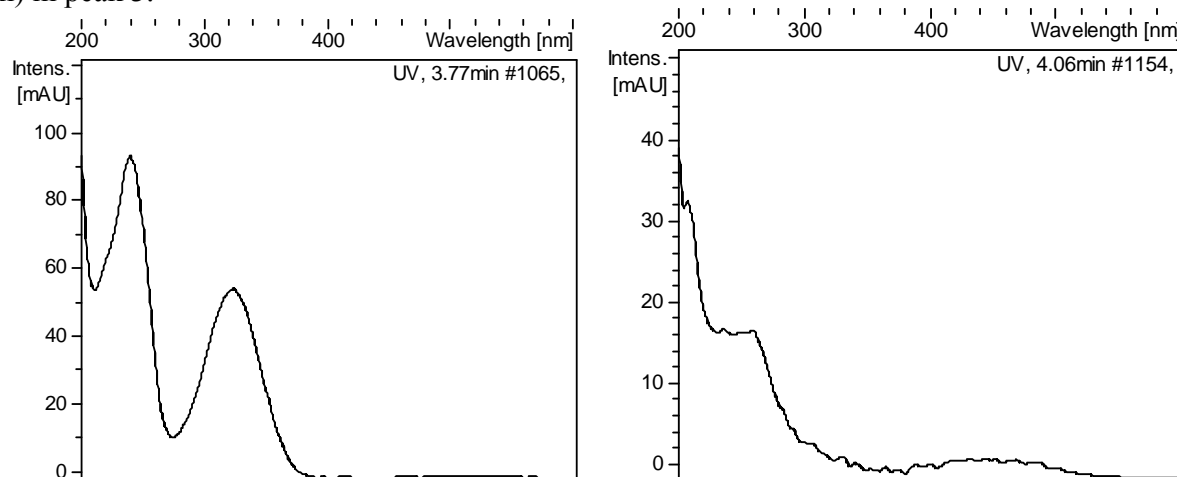

**Figure S17.**  $^1\text{H}$  NMR spectrum of peak **3** ( $\text{DMSO}-d_6$ , 500 MHz).

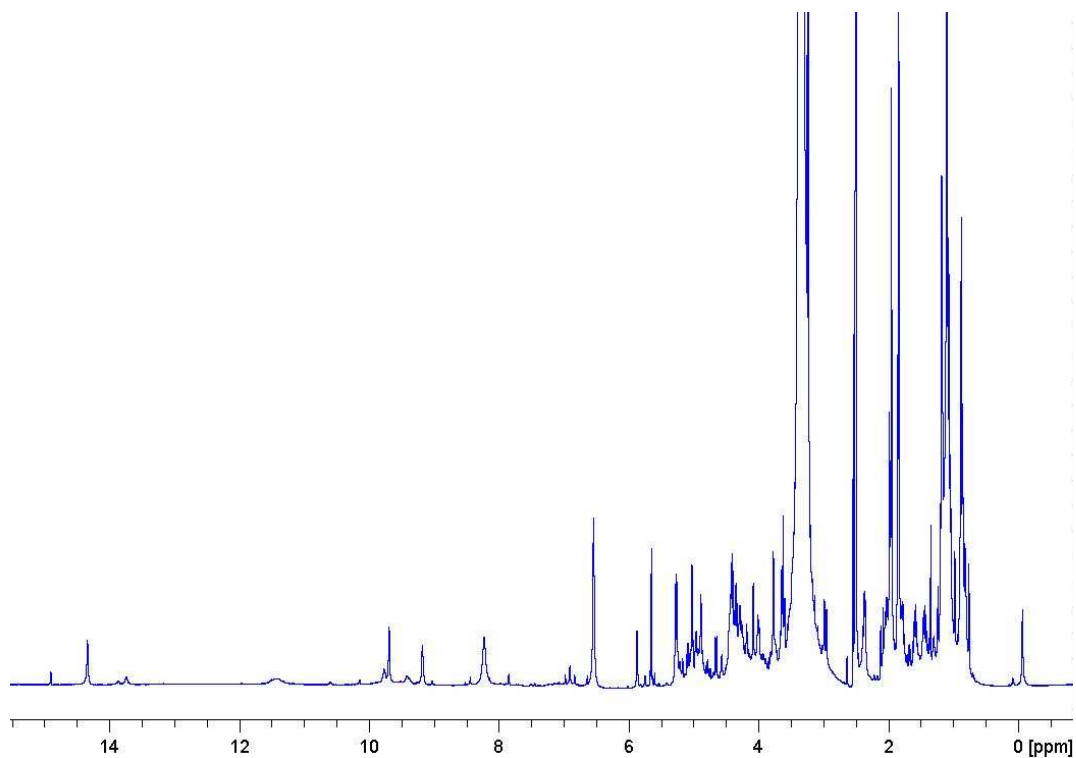

**Figure S18.** HSQC spectrum of peak 3.

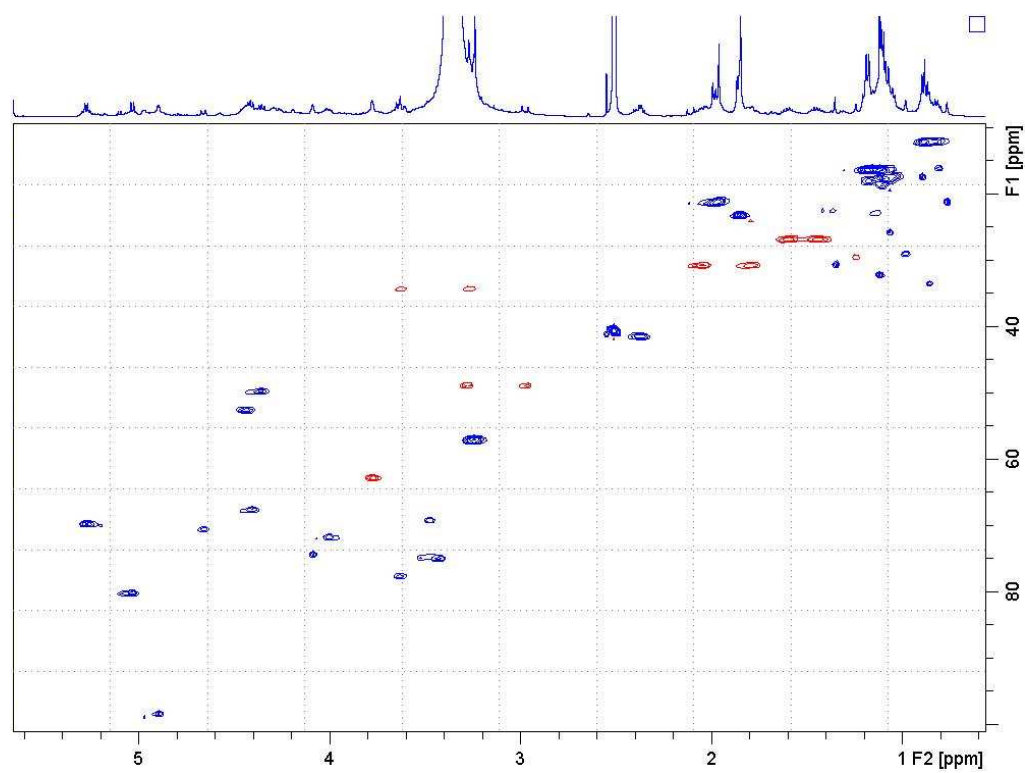

## Structural characterization of compounds in peak 4

**Figure S19.** Chromatogram (trace at 210 nm) of peak 4.

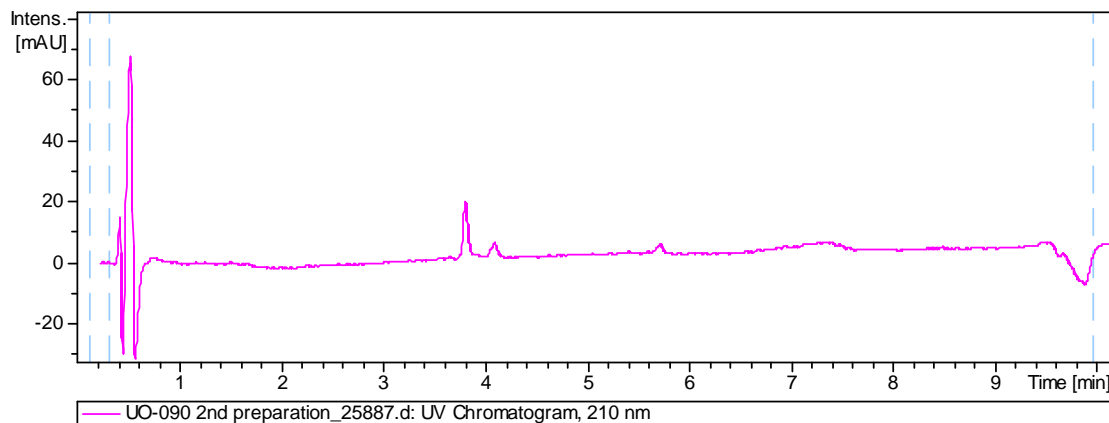

**Figure S20.** HRMS spectra of compound **4** (3.81 min) and secondary compound **4'** (4.09 min) in peak 4.

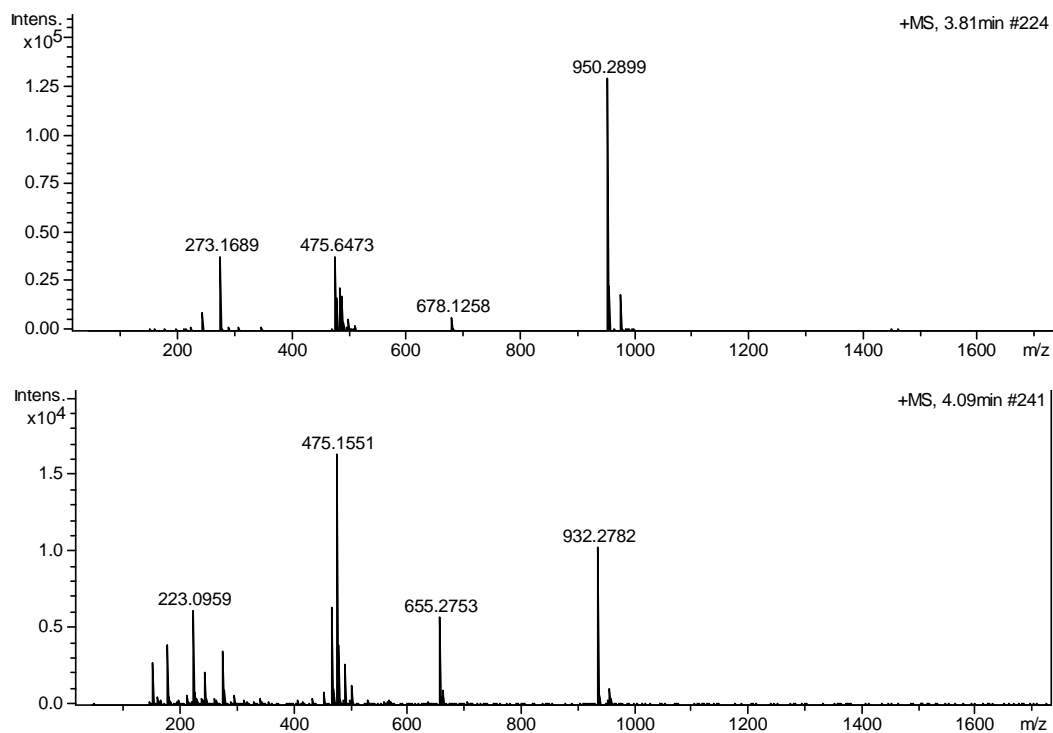

**Figure S21.** UV-vis (DAD) spectra of compound **4** (3.81 min) and secondary compound **4'** (4.09 min) in peak **4**.

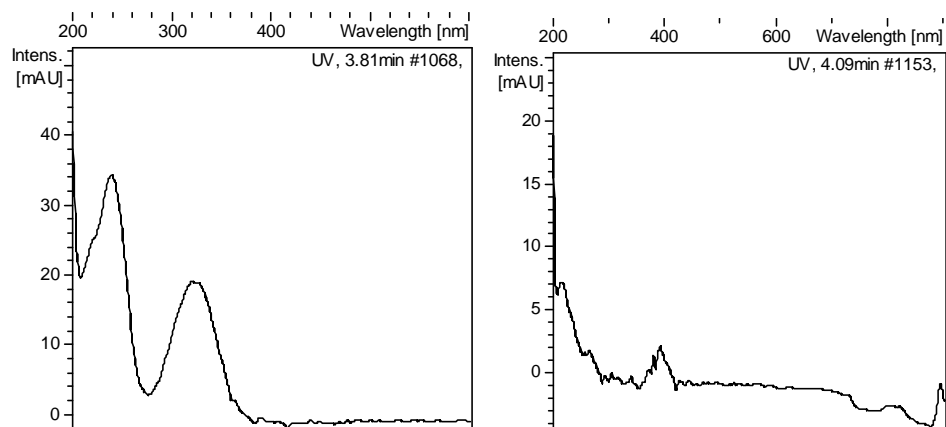

**Figure S22.**  $^1\text{H}$  NMR spectrum of peak **4** (DMSO- $d_6$ , 500 MHz).

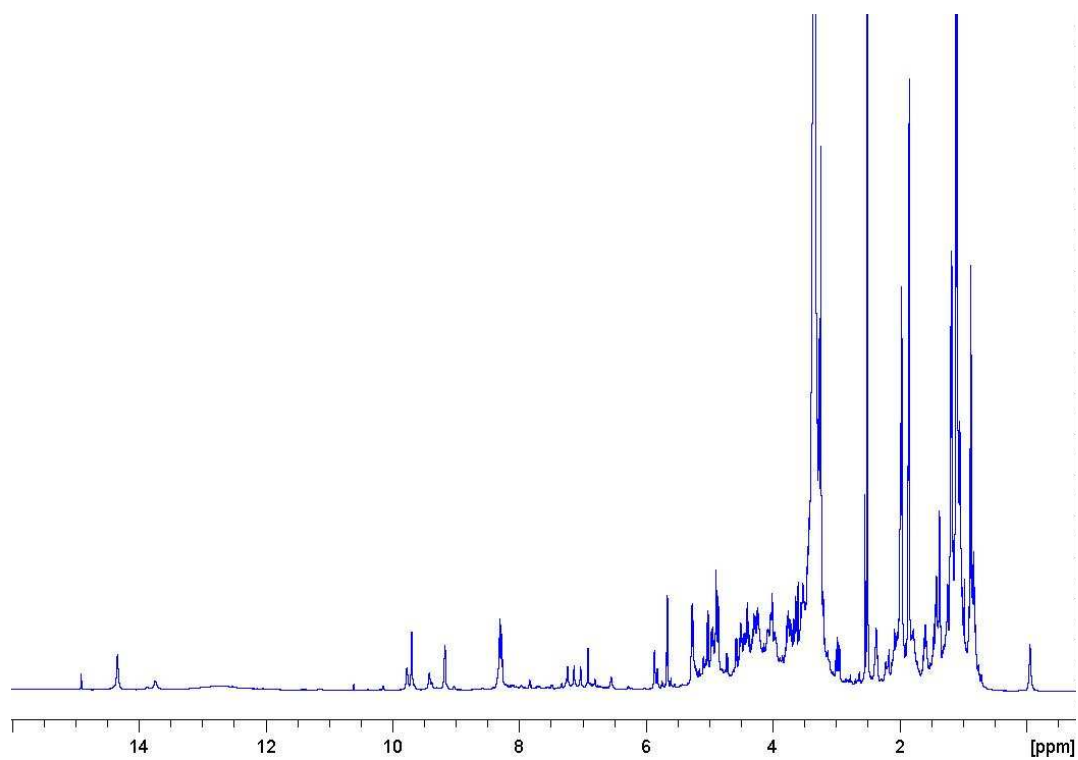

**Figure S23.** HSQC spectrum of peak 4.

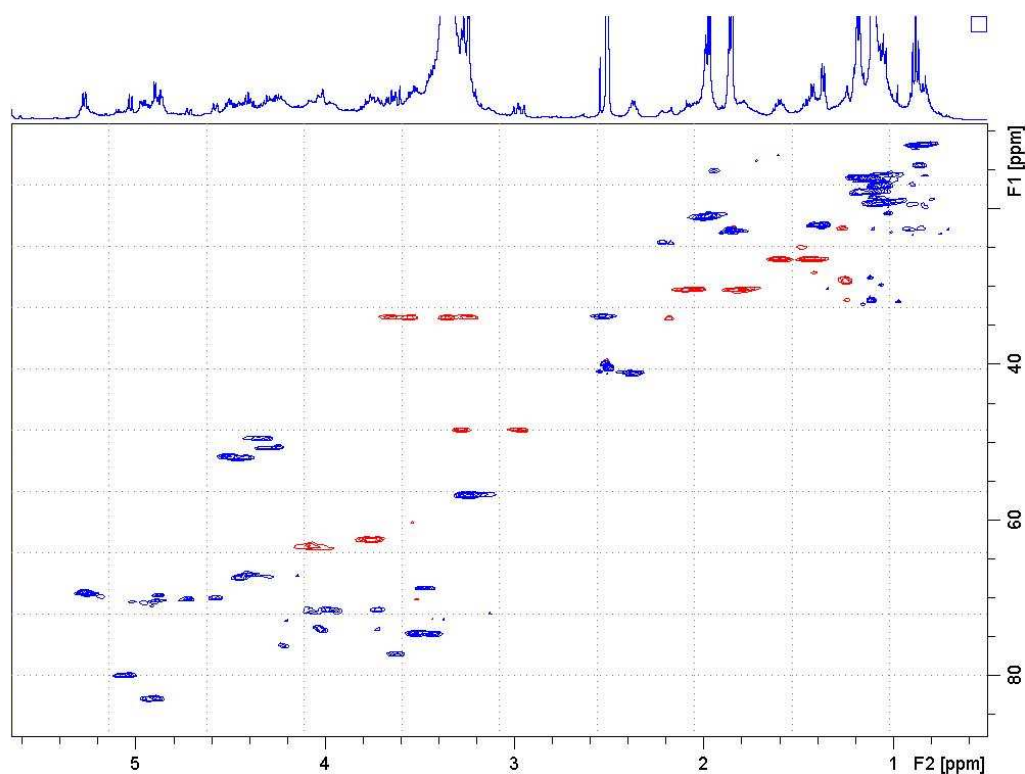

**Figure S24.** UPLC chromatograms, monitored at 238 nm, of mutant *S. albus* B29 grown in R5A liquid medium and fed with  $50\ \mu\text{g mL}^{-1}$  of compound **1**.

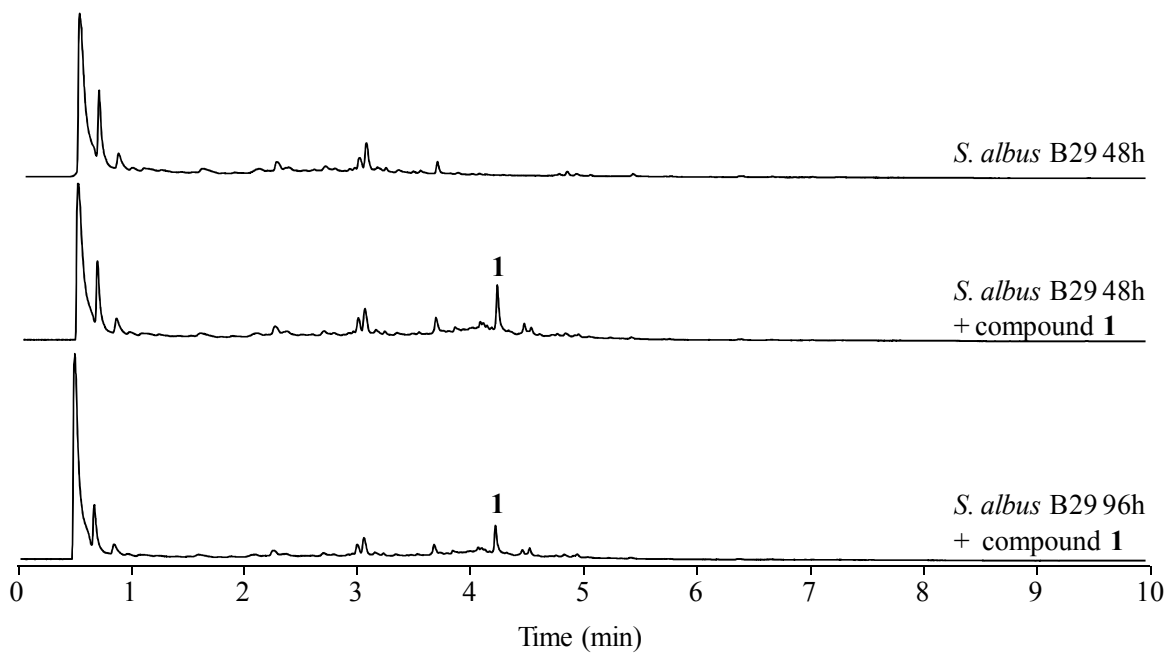

**Figure S25.** UPLC chromatograms, monitored at 238 nm, of mutant *S. albus* B29 grown in R5A liquid medium and fed with 50  $\mu\text{g mL}^{-1}$  of compound **2**.

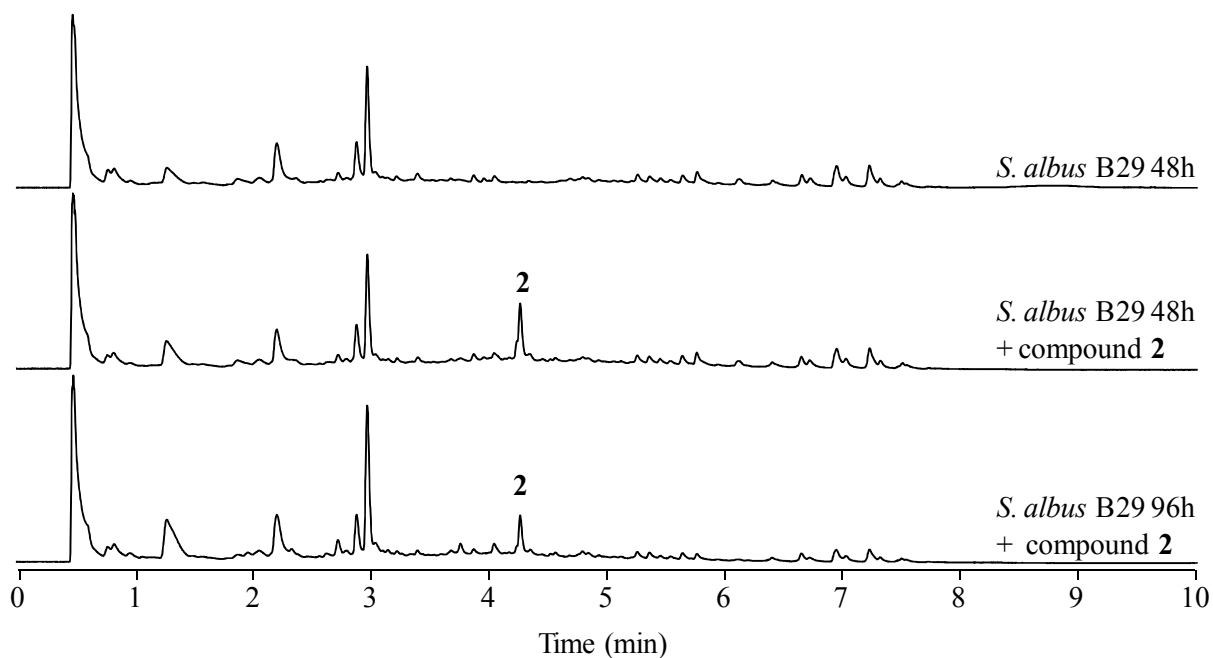

**Figure S26.** UPLC chromatograms, monitored at 238 nm, of mutant *S. albus* B29 grown in R5A liquid medium and fed with 50  $\mu\text{g mL}^{-1}$  of compound **4**.

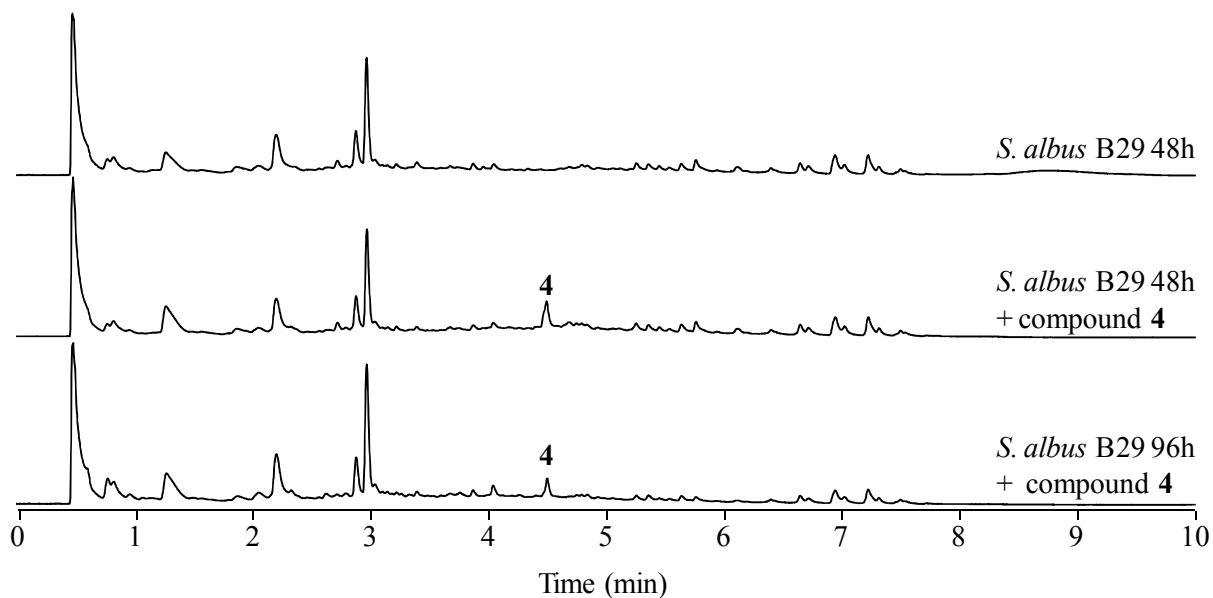

**Figure S27.** UPLC chromatograms, monitored at 238 nm, of mutant *S. albus* B29 grown in R5A liquid medium and fed with 50  $\mu\text{g mL}^{-1}$  of paulomycin B (**6**) that is transformed into paulomenol B (**8**) and compound (**2**).

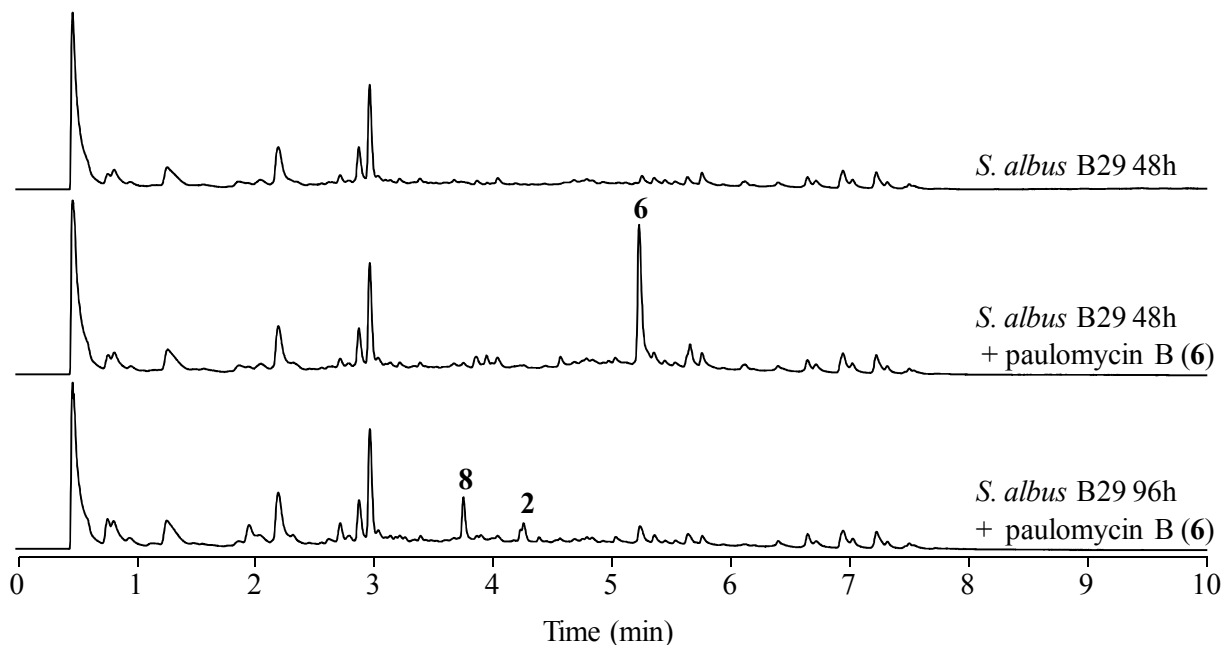

**Figure S28.** UPLC chromatograms, monitored at 238 nm, of mutant *S. albus* B29 grown in R5A liquid medium and fed with 50  $\mu\text{g mL}^{-1}$  of paulomycin A (**5**) that is transformed into paulomenol A (**7**) and compound (**3**).

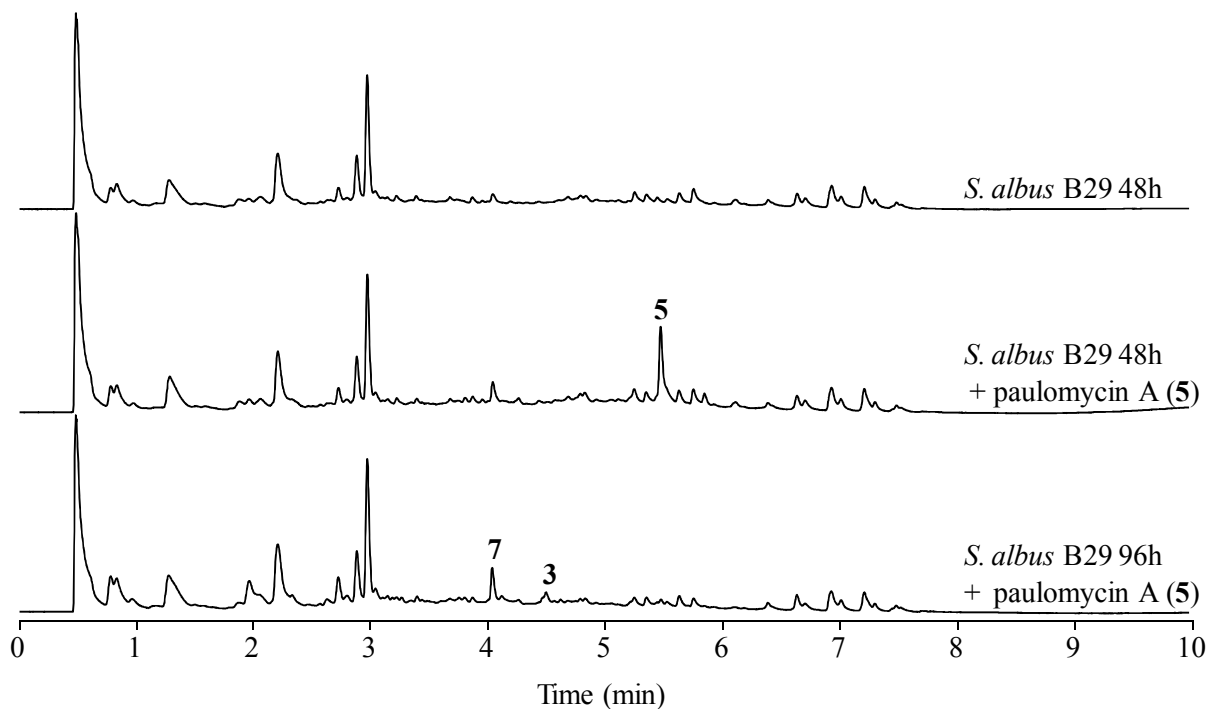

Supplement: Supplementary file 1 [file molecules-22-01758-s001.pdf]
